# Supplementary material for: Mechanism-based site-directed mutagenesis to shift the optimum pH of the phenylalanine ammonia-lyase from Rhodotorula glutinis JN-1
Source: PubMed Central journal article supplement — Biotechnol Rep (Amst). 2014 Jun 6;3:21–6. doi: 10.1016/j.btre.2014.06.001 (PMC5466100; doi:10.1016/j.btre.2014.06.001), 2014-06-06
Supplement: mmc1.pdf [file mmc1.pdf]

1 **Supplementary material**

2 **Mechanism-based site-directed mutagenesis to shift the optimum pH of phenylalanine**  
3 **ammonia-lyase from *Rhodotorula glutinis* JN-1**

4

5 Longbao Zhu\*, Li Zhou\*, Wenjing Cui, Zhongmei Liu, and Zhemin Zhou<sup>¶</sup>

6 Key Laboratory of Industrial Biotechnology, Ministry of Education, School of Biotechnology, Jiangnan University,

7 Wuxi 214122, China.

8 \* These authors contributed equally to this work.

9 <sup>¶</sup> To whom correspondence should be addressed.

10 Zhemin Zhou, Tel: +86-510-85325210, Fax: +86-510-85197551,

11 E-mail: [zhmzhou@jiangnan.edu.cn](mailto:zhmzhou@jiangnan.edu.cn)

12

13

14

15

16

17

18

19

20

21

22

1 **Supplementary table**

2 **Table S1 Oligonucleotide primers used for site-directed mutagenesis**

| Mutant enzyme | Nucleotide sequence (5'→3') <sup>a</sup>                 |
|---------------|----------------------------------------------------------|
| Wt- PAL-up    | <b>GGAATTCCAT</b> ATGATGGCCCCCTCCGTCGACTCGATC            |
| Wt- PAL-down  | CG <b>GGAATTC</b> CTAGTATGGTCTACGTCCAAAGG                |
| RgPAL-H136F   | CAG AAG GCT CTG CTC GAG <u>TTC</u> (CAC) CAA CTC TGC GGT |
| RgPAL-H136E   | CAG AAG GCT CTG CTC GAG <u>GAG</u> (CAC) CAA CTC TGC GGT |
| RgPAL-Q137L   | CAG AAG GCT CTG CTC GAG CAC <u>CTC</u> (CAA) CTC TGC GGT |
| RgPAL-Q137E   | CAG AAG GCT CTG CTC GAG CAC <u>GTG</u> (CAA) CTC TGC GGT |
| RgPAL-H136K   | CAG AAG GCT CTG CTC GAG <u>AAG</u> (CAC) CAA CTC TGC GGT |
| RgPAL-Q137K   | CAG AAG GCT CTG CTC GAG CAC <u>AAG</u> (CAA) CTC TGC GGT |
| RgPAL-Δ136H   | CAG AAG GCT CTG CTC GAG (CAC) CAA CTC TGC GGT            |
| RgPAL-Δ137Q   | CAG AAG GCT CTG CTC GAG CAC (CAA) CTC TGC GGT            |

- 3 <sup>a</sup> Nucleotides underlined correspond to the codon chosen for mutation. Nucleotides in parentheses
- 4 replace the underlined nucleotides. Bold letters denote the *NdeI* and *EcoRI* restriction sites in PAL-up
- 5 and PAL-down, respectively. Δ indicated the truncation.

1 **Supplementary figures**

2 **Fig. S1 The Friedel-Crafts-type mechanism of *Rg*PAL**

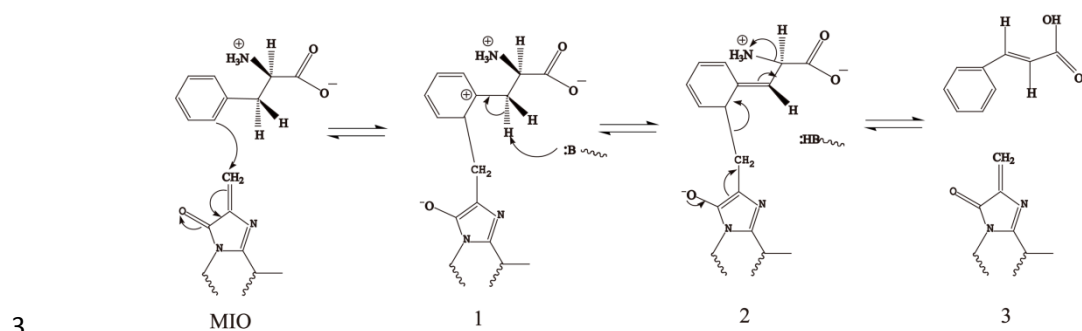

4 The mechanism for PAL was consulted from the reports of Calabrese (2004), Poppe (2005) and  
5 Strom (2012). In the Friedel-Crafts-type reaction, the MIO attack the phenyl ring of the substrate to  
6 form carbocation **1** which would stabilize intermediate **2** formed by removal of the substrate's C3  
7 hydrogen; **3**, Collapse of the system to product occurs with the elimination of NH<sub>3</sub> and the release of  
8 cinnamate from the MIO.
